# Supplementary material for: Shape transition of water-in-CO2 reverse micelles controlled by the surfactant midpiece
Source: Royal Society of Chemistry journal article supplement (doi:10.1039/c8cp01844h), 2018-01-01
Supplement: c8cp01844h1.pdf [file c8cp01844h1.pdf]

# Shape Transition of Water-in-CO<sub>2</sub> Reverse Micelles: Controlled by Surfactant Midpiece

*Muhan Wang,<sup>a</sup> Junfeng Wang,<sup>a</sup> Timing Fang,<sup>a</sup> Youguo Yan,<sup>a</sup> Zhiyuan Wang,<sup>\* b</sup> and Jun Zhang,<sup>\*a</sup>*

<sup>a</sup>College of Science, China University of Petroleum, 266580 Qingdao, Shandong, China

<sup>b</sup>School of Petroleum Engineering, China University of Petroleum, 266580 Qingdao, Shandong, China

KEYWORDS: Supercritical CO<sub>2</sub>, Surfactant self-assembly, Wormlike reverse micelles, Molecular dynamics

\* Corresponding author at: College of Science, China University of Petroleum, 266580 Qingdao, Shandong, China. Tel.: +86 0532-86983366.

E-mail address: [zhangjun.upc@gmail.com](mailto:zhangjun.upc@gmail.com) (Jun Zhang).

E-mail address: [wangzy1209@126.com](mailto:wangzy1209@126.com). (Zhiyuan Wang).

## S1 - The Details of OPLS Force Field

The OPLS force field is expressed as:

$$E_{total} = E_{bonds} + E_{angles} + E_{dihedrals} + E_{nonbonded} \quad (1)$$

$$E_{bonds} = \sum_{bonds} K_r (r - r_0)^2 \quad (2)$$

$$E_{angles} = \sum_{angles} K_\theta (\theta - \theta_0)^2 \quad (3)$$

$$E_{dihedrals} = \sum_{dihedrals} \left( \frac{V_1}{2} [1 + \cos(\varphi - \varphi_1)] + \frac{V_2}{2} [1 - \cos(2\varphi - \varphi_2)] + \frac{V_3}{2} [1 + \cos(3\varphi - \varphi_3)] + \frac{V_4}{2} [1 - \cos(4\varphi - \varphi_4)] \right) \quad (4)$$

$$E_{nonbonded} = \sum_{i>j} \left[ \epsilon_{ij} \left( \frac{\sigma^{12}}{r_{ij}^{12}} - \frac{\sigma^6}{r_{ij}^6} \right) + \frac{q_i q_j e^2}{4\pi\epsilon_0 r_{ij}} \right] \quad (5)$$

Where  $E_{total}$  is the total energy in the system which is equal to the energy of bond stretching ( $E_{bonds}$ ) plus angles shake ( $E_{angles}$ ) plus dihedrals shake ( $E_{dihedrals}$ ) plus pairwise ( $E_{nonbonded}$ ).

## S2 – The Interfacial Tension Calculation

The interfacial tension was calculated using the formulation of the Gibbs interfacial tension.<sup>1</sup> Two interfaces are both perpendicular to the z axis and parallel to the xy plane, hence the interfacial tension is evaluated from the expression of pressure tensor<sup>2</sup>:

$$IFT = -\frac{1}{2} \left( \frac{P_x + P_y}{2} - P_z \right) L_z \quad (6)$$

Where  $P_i$  ( $i = x, y, z$ ) is the diagonal elements of the pressure tensor, and  $L_z$  is the length of the simulation box in z direction.

### S3 – The Repeat MD Trajectory

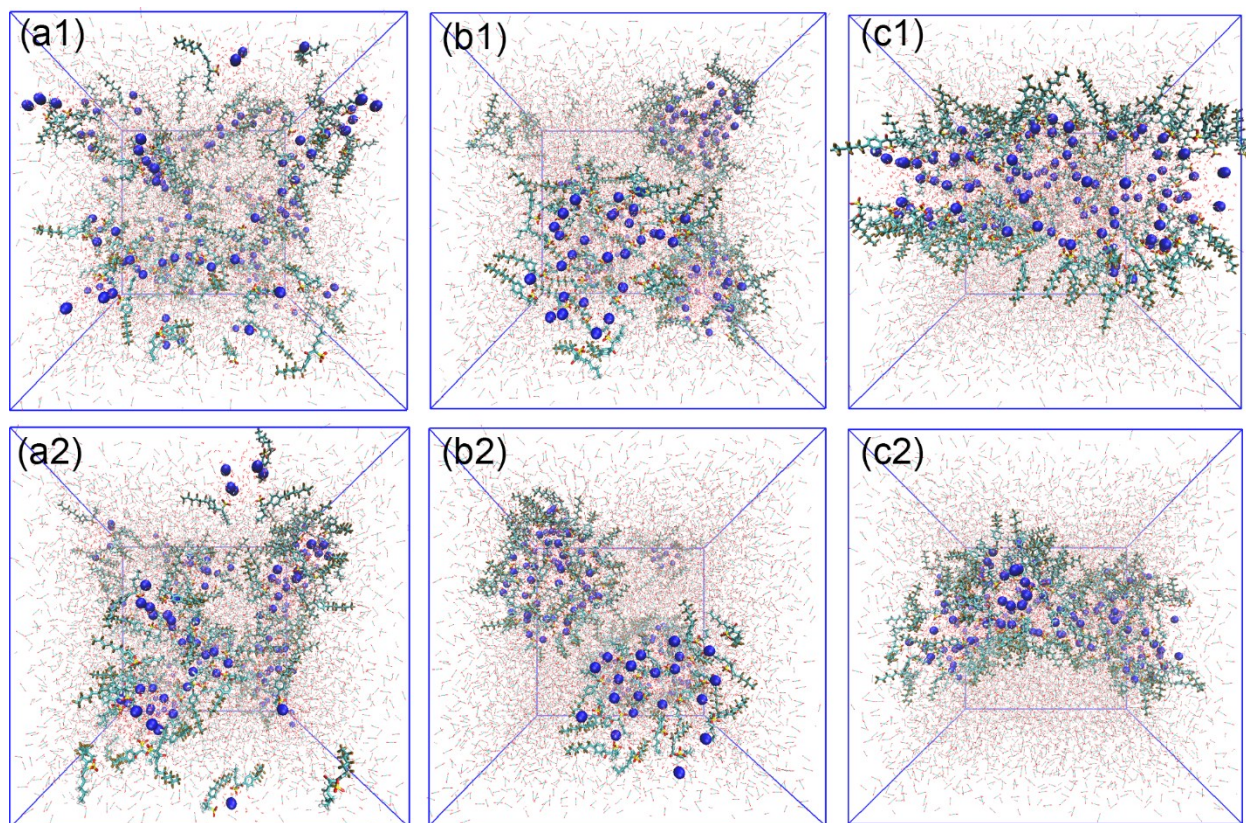

**Figure S1.** The repeated time evolutions of phenyl FC6-HC5 surfactant self-assembly. (a1) or (a2) 0 ns, (b1) or (b2) 2 ns, (c1) or (c2) 20 ns



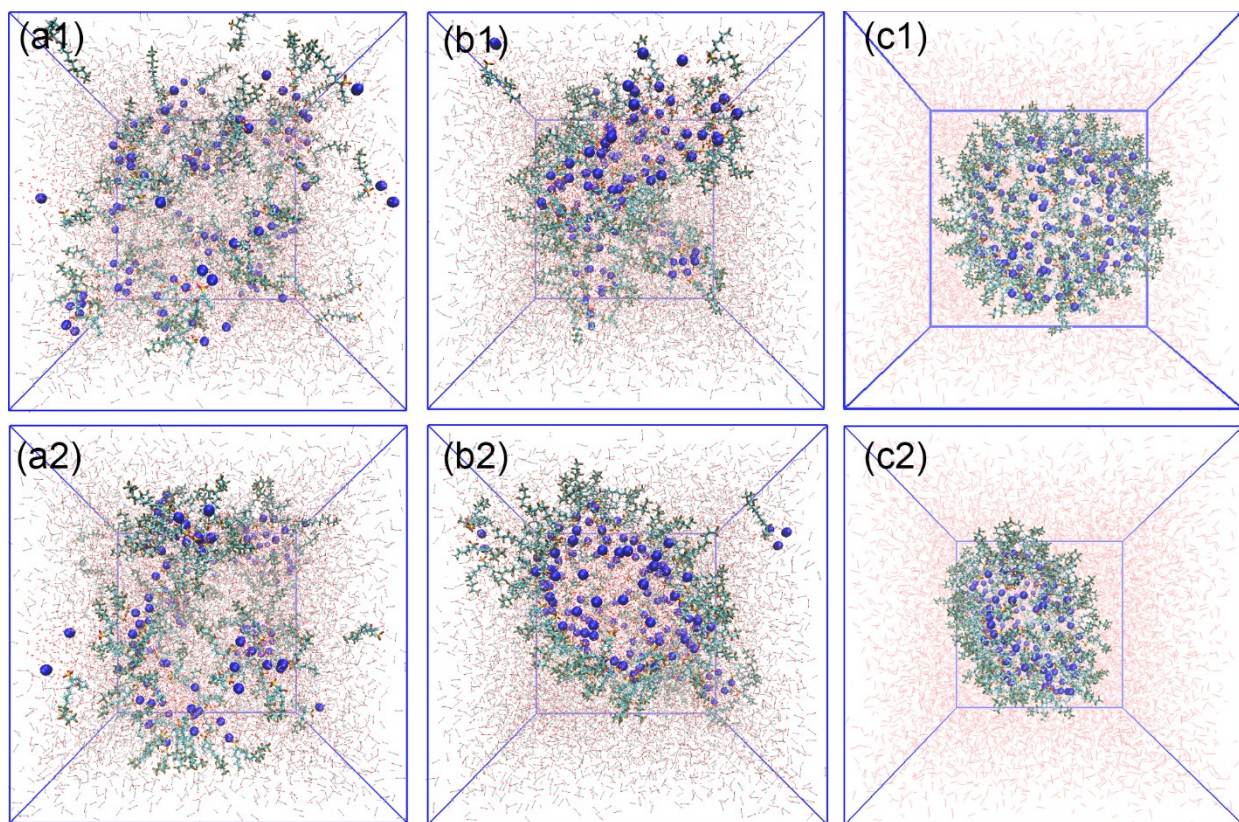

**Figure S2.** The repeated time evolutions of alkyl FC6-HC5 surfactant self-assembly. (a1) or (a2) 0 ns, (b1) or (b2) 10 ns, (c1) or (c2) 20 ns

## S4 – Aspect Ratio of Rod-like Reverse Micelles

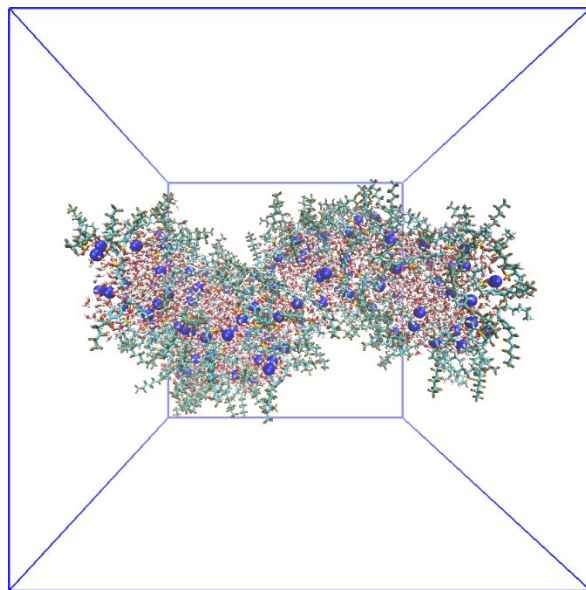

**Figure S3.** The periodic boundary condition of simulation box.

Due to the periodic boundary condition of simulation the length of rod-like RM is 99.7 Å. And the radius of rod-like RM is 24.16. Therefore, the Aspect Ratio of Rod-like Reverse Micelles is 0.24.

## S5 – The Free Volume Calculation

The free volume of phenyl FC6-HC5 and alkyl FC6-HC5 have been calculated in Figure S1. We used radius of 1.5 Å, due to the van der Waals radius of CO<sub>2</sub>. According to previously studies,<sup>3</sup> surfactant CO<sub>2</sub>-philicity were high related with their free volumes. The higher free volumes is, the higher CO<sub>2</sub>-philicity will be.

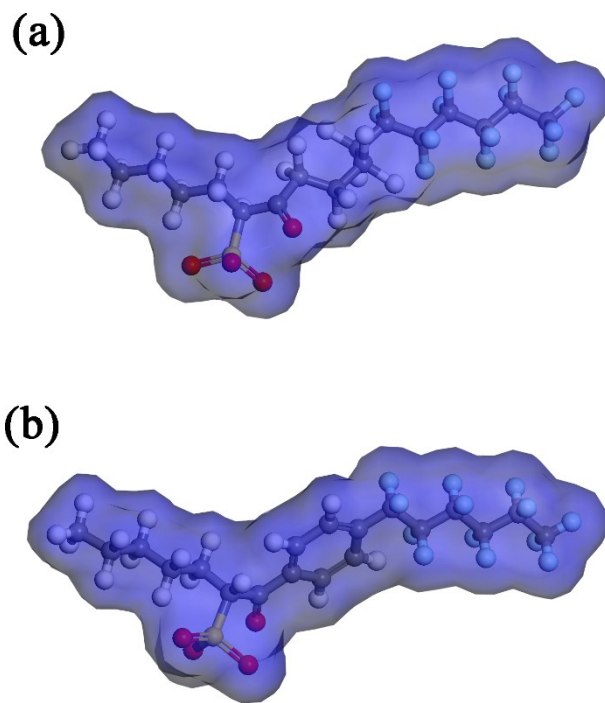

**Figure S4.** The free volume of (a) alkyl FC6-HC5 and (b) phenyl FC6-HC5

The free volume of alkyl FC6-HC5 is 2561 Å<sup>3</sup> and the free volume of phenyl FC6-HC5 is 2507. There are only 2% difference, which indicates that they have similar CO<sub>2</sub>-philicity.

## S6 –The Detail of Umbrella Sampling Method

In this paper, all the PMF profiles were calculated by the Umbrella Sampling (US) method<sup>4</sup> using the *Colvars* software<sup>5</sup>. Us is already used for calculating the PMF profiles in MD simulations.<sup>6-7</sup> The example of detail configuration as follow:

```
colvarsTrajFrequency 100
colvarsRestartFrequency 5000
colvar {
  name US
  width 0.1
  lowerboundary 0.0
  upperboundary 50.0
  lowerwallconstant 10.0
  upperwallconstant 10.0
  distance {
    #forceNoPBC yes
    group1 {
      atomNumbersRange { #Group 1# }
    }
    group2 {
      atomnumbersRange { #Group 2# }
    }
  }
}
harmonic {
  colvars US
  forceConstant 0.01
  centers 50
  targetCenters 10
  targetNumStages 40
  targetNumSteps 200000
  outputCenters on
}
```



## S7 – Calculation of the Order Parameter

The order parameter can evaluate whether the molecules are ordered, which is mostly used in nematic liquid-crystal.<sup>8</sup>

Moreover, the order parameter is relevant parameter to evaluate the molecular arrangement and the aggregation structures which is expressed as follow:

$$S_m = \frac{1}{2} \langle 3\cos^2\beta - 1 \rangle \quad (7)$$

In the equation,  $\beta$  is the angle between two orientations of the vector along the head to carbon on the surfactant backbone. A value of 1 means that the vectors are parallel, a value of -0.5 means that the vectors are perpendicular, and 0 suggests random orientation.

## S8 – Definition of Included Angle Calculation

The definition of included angle ( $\theta$ ) is the angle of two surfactant fluorocarbon tail which is shown in Figure S2.

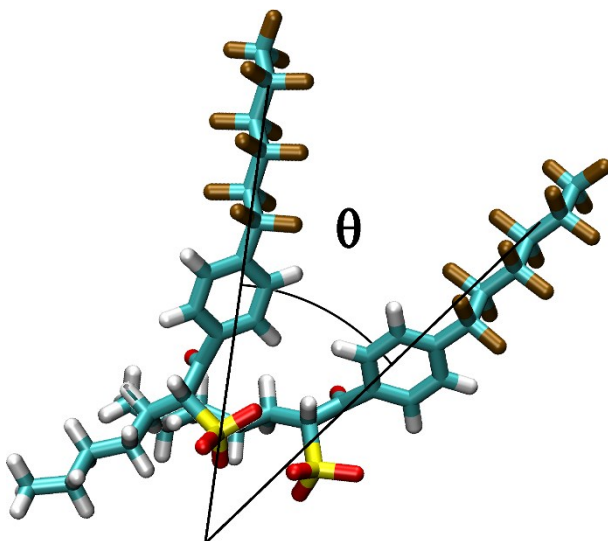

**Figure S5.** Definition of included angle calculation.

The included angle could be used to analyze the arrangement of surfactant on the interface of RMs.

## REFERENCES

- (1) de Lara, L. S.; Michelon, M. F.; Miranda, C. R. Molecular dynamics studies of fluid/oil interfaces for improved oil recovery processes. *J. Phys. Chem. B* **2012**, *116* (50), 14667-14676.
- (2) Iglaier, S.; Mathew, M.; Bresme, F. Molecular dynamics computations of brine–CO<sub>2</sub> interfacial tensions and brine–CO<sub>2</sub>–quartz contact angles and their effects on structural and residual trapping mechanisms in carbon geo-sequestration. *J. Colloid Interface Sci.* **2012**, *386* (1), 405-414.
- (3) Stone, M. T.; da Rocha, S. R.; Rossky, P. J.; Johnston, K. P. Molecular differences between hydrocarbon and fluorocarbon surfactants at the CO<sub>2</sub>/water interface. *J. Phys. Chem. B* **2003**, *107* (37), 10185-10192.
- (4) Torrie, G. M.; Valleau, J. P. Nonphysical sampling distributions in Monte Carlo free-energy estimation: Umbrella sampling. *J. Comput. Phys.* **1977**, *23* (2), 187-199.
- (5) Fiorin, G.; Klein, M. L.; Hénin, J. Using collective variables to drive molecular dynamics simulations. *Mol. Phys.* **2013**, *111* (22-23), 3345-3362.
- (6) Bejagam, K. K.; Balasubramanian, S. Supramolecular Polymerization: A Coarse Grained Molecular Dynamics Study. *J. Phys. Chem. B* **2015**, *119* (17), 5738-5746.
- (7) Drensko, M.; Loverde, S. M. Characterisation of the hydrophobic collapse of polystyrene in water using free energy techniques. *Molecular Simulation* **2016**, 1-8.
- (8) de Gennes, P.-G.; Prost, J. The physics of liquid crystals (international series of monographs on physics). *Oxford University Press, USA* **1995**, 2, 4.
